# Supplementary material
Source: HighWire-hosted journal article supplement (https://erj.ersjournals.com/content/49/5/1601505)

## **Supplemental Data**

### **A meta-analysis of genome-wide association studies of asthma in Puerto Ricans**

Qi Yan,<sup>1</sup> John Brehm,<sup>1</sup> Maria Pino-Yanes,<sup>2,3</sup> Erick Forno,<sup>1</sup> Jerome Lin,<sup>4</sup> Sam S. Oh,<sup>5</sup> Edna Acosta-Perez,<sup>6</sup> Cathy C. Laurie,<sup>7</sup> Michelle M. Cloutier,<sup>8</sup> Benjamin A. Raby,<sup>9</sup> Adrienne M. Stilp,<sup>7</sup> Tamar Sofer,<sup>7</sup> Donglei Hu,<sup>5</sup> Scott Huntsman,<sup>5</sup> Celeste S. Eng,<sup>5</sup> Matthew P. Conomos,<sup>7</sup> Deepa Rastogi,<sup>10</sup> Kenneth Rice,<sup>7</sup> Glorisa Canino,<sup>6</sup> Wei Chen,<sup>1</sup> R. Graham Barr,<sup>11,13</sup> Esteban G. Burchard,<sup>5,12,13</sup> Juan C. Celedón<sup>1,13,\*</sup>

<sup>1</sup>Division of Pediatric Pulmonary Medicine, Allergy, and Immunology, Children's Hospital of Pittsburgh of UPMC, University of Pittsburgh, Pittsburgh, PA 15224, USA

<sup>2</sup>CIBER de Enfermedades Respiratorias, Instituto de Salud Carlos III, Madrid, Spain

<sup>3</sup>Research Unit, Hospital Universitario N.S. de Candelaria, Universidad de La Laguna, Santa Cruz de Tenerife, Spain

<sup>4</sup>Department of Human Genetics, Graduate School of Public Health, University of Pittsburgh, Pittsburgh, PA 15261, USA

<sup>5</sup>Department of Medicine, University of California San Francisco, San Francisco, CA 94143, USA

<sup>6</sup>Behavioral Sciences Research Institute, University of Puerto Rico, San Juan, Puerto Rico

<sup>7</sup>Department of Biostatistics, University of Washington, Seattle, WA 98195, USA

<sup>8</sup>Department of Pediatrics, University of Connecticut, Farmington, CT 06030, USA

<sup>9</sup>Channing Division of Network Medicine, Department of Medicine, Brigham and Women's Hospital, Harvard Medical School, MA 02115, USA

<sup>10</sup>Department of Pediatrics, Albert Einstein College of Medicine, Bronx, NY 10461, USA

<sup>11</sup>Department of Epidemiology, Columbia University, New York, NY 10027, USA

<sup>12</sup>Department of Bioengineering and Therapeutic Sciences, University of California San Francisco, San Francisco, CA 94143, USA

<sup>13</sup>These authors contributed equally to this work

\*Correspondence: [juan.celedon@chp.edu](mailto:juan.celedon@chp.edu).

**Table S1.** SNPs across the genome with meta-analysis (Hartford-PR, GALA I, GALA II and HCHS/SOL)  $P$ -values  $< 5 \times 10^{-8}$ 

| SNP         | Chr | Position | Ref   | Alt   | Gene               | Region     | Hartford-PR |            | GALA I |            | GALA II |            | HCHS/SOL |            | Combined |
|-------------|-----|----------|-------|-------|--------------------|------------|-------------|------------|--------|------------|---------|------------|----------|------------|----------|
|             |     |          |       |       |                    |            | RAF         | $P$ -value | RAF    | $P$ -value | RAF     | $P$ -value | RAF      | $P$ -value |          |
| rs2941522   | 17  | 37910368 | C     | T     | <i>GRB7,IKZF3</i>  | intergenic | 0.44        | 6.55E-05   | 0.43   | 4.77E-01   | 0.43    | 5.15E-06   | 0.44     | 2.25E-01   | 2.86E-08 |
| rs12946510  | 17  | 37912377 | C     | T     | <i>GRB7,IKZF3</i>  | intergenic | 0.67        | 6.23E-06   | 0.68   | 3.55E-02   | 0.67    | 2.35E-07   | 0.65     | 7.78E-02   | 5.90E-12 |
| rs907092    | 17  | 37922259 | G     | A     | <i>IKZF3</i>       | exonic     | 0.69        | 4.96E-06   | 0.69   | 2.33E-02   | 0.68    | 3.95E-08   | 0.66     | 9.17E-02   | 1.16E-12 |
| rs10445308  | 17  | 37938047 | C     | T     | <i>IKZF3</i>       | intronic   | 0.67        | 6.15E-06   | 0.67   | 4.02E-02   | 0.66    | 5.03E-07   | 0.64     | 7.08E-02   | 1.01E-11 |
| rs12942330  | 17  | 37939839 | C     | T     | <i>IKZF3</i>       | intronic   | 0.67        | 6.66E-06   | 0.67   | 4.02E-02   | 0.66    | 5.81E-07   | 0.64     | 7.17E-02   | 1.23E-11 |
| rs11658993  | 17  | 37940808 | C     | T     | <i>IKZF3</i>       | intronic   | 0.67        | 1.34E-06   | 0.67   | 4.60E-02   | 0.66    | 5.56E-07   | 0.65     | 7.41E-02   | 5.09E-12 |
| rs4795395   | 17  | 37962987 | T     | A     | <i>IKZF3</i>       | intronic   | 0.67        | 8.49E-06   | 0.67   | 4.14E-02   | 0.66    | 5.48E-07   | 0.64     | 7.86E-02   | 1.66E-11 |
| rs9909593   | 17  | 37970149 | A     | G     | <i>IKZF3</i>       | intronic   | 0.67        | 9.34E-06   | 0.67   | 4.05E-02   | 0.66    | 4.66E-07   | 0.64     | 7.85E-02   | 1.51E-11 |
| rs34233420  | 17  | 38004929 | GATTT | G     | <i>IKZF3</i>       | intronic   | 0.67        | 5.20E-06   | 0.67   | 3.04E-02   | 0.67    | 1.45E-06   | 0.64     | 8.40E-02   | 2.41E-11 |
| rs4795397   | 17  | 38023745 | A     | G     | <i>ZBPB2</i>       | upstream   | 0.67        | 1.66E-06   | 0.66   | 7.50E-03   | 0.66    | 8.86E-07   | 0.64     | 1.02E-01   | 3.73E-12 |
| rs11557466  | 17  | 38024626 | C     | T     | <i>ZBPB2</i>       | exonic     | 0.69        | 3.92E-06   | 0.68   | 2.86E-03   | 0.68    | 1.73E-06   | 0.65     | 9.16E-02   | 5.21E-12 |
| rs11078925  | 17  | 38025208 | T     | C     | <i>ZBPB2</i>       | intronic   | 0.69        | 3.92E-06   | 0.68   | 2.86E-03   | 0.68    | 1.59E-06   | 0.65     | 9.16E-02   | 4.82E-12 |
| rs200306858 | 17  | 38025643 | T     | TTTCC | <i>ZBPB2</i>       | intronic   | 0.65        | 5.13E-05   | 0.65   | 4.14E-03   | 0.63    | 4.02E-05   | 0.61     | 3.72E-01   | 9.16E-09 |
| rs34120102  | 17  | 38026035 | G     | A     | <i>ZBPB2</i>       | intronic   | 0.69        | 4.58E-06   | 0.68   | 3.11E-03   | 0.68    | 1.73E-06   | 0.65     | 7.83E-02   | 4.52E-12 |
| rs11655198  | 17  | 38026169 | C     | T     | <i>ZBPB2</i>       | intronic   | 0.65        | 5.67E-05   | 0.63   | 8.07E-03   | 0.63    | 7.65E-05   | 0.60     | 3.97E-01   | 2.83E-08 |
| rs11650661  | 17  | 38026286 | A     | T     | <i>ZBPB2</i>       | intronic   | 0.65        | 5.67E-05   | 0.63   | 7.06E-03   | 0.63    | 4.85E-05   | 0.60     | 3.97E-01   | 1.77E-08 |
| rs11655292  | 17  | 38026361 | C     | G     | <i>ZBPB2</i>       | intronic   | 0.65        | 5.67E-05   | 0.63   | 6.90E-03   | 0.63    | 5.86E-05   | 0.60     | 3.97E-01   | 2.05E-08 |
| rs12709365  | 17  | 38027400 | A     | G     | <i>ZBPB2</i>       | intronic   | 0.66        | 4.87E-05   | 0.65   | 8.10E-03   | 0.65    | 3.11E-05   | 0.62     | 2.33E-01   | 3.80E-09 |
| rs13380815  | 17  | 38027583 | A     | G     | <i>ZBPB2</i>       | intronic   | 0.66        | 4.87E-05   | 0.65   | 8.10E-03   | 0.65    | 3.11E-05   | 0.62     | 2.33E-01   | 3.80E-09 |
| rs11557467  | 17  | 38028634 | G     | T     | <i>ZBPB2</i>       | exonic     | 0.64        | 2.64E-05   | 0.61   | 7.93E-03   | 0.61    | 1.15E-04   | 0.59     | 3.84E-01   | 2.29E-08 |
| rs11870965  | 17  | 38030205 | T     | A     | <i>ZBPB2</i>       | intronic   | 0.66        | 4.87E-05   | 0.65   | 8.10E-03   | 0.64    | 4.54E-05   | 0.62     | 2.32E-01   | 5.26E-09 |
| rs9903250   | 17  | 38031030 | A     | A     | <i>ZBPB2</i>       | intronic   | 0.64        | 2.45E-05   | 0.63   | 4.54E-03   | 0.63    | 3.38E-05   | 0.60     | 3.74E-01   | 5.26E-09 |
| rs9905959   | 17  | 38031138 | A     | G     | <i>ZBPB2</i>       | intronic   | 0.66        | 4.71E-05   | 0.66   | 3.56E-03   | 0.67    | 7.64E-05   | 0.63     | 2.04E-01   | 3.87E-09 |
| rs11658278  | 17  | 38031164 | T     | C     | <i>ZBPB2</i>       | intronic   | 0.62        | 3.14E-06   | 0.62   | 1.02E-02   | 0.62    | 3.19E-04   | 0.60     | 2.48E-01   | 7.62E-09 |
| rs10852935  | 17  | 38031674 | C     | T     | <i>ZBPB2</i>       | exonic     | 0.69        | 4.58E-06   | 0.68   | 3.83E-03   | 0.68    | 1.69E-06   | 0.65     | 9.55E-02   | 7.43E-12 |
| rs10852936  | 17  | 38031714 | C     | T     | <i>ZBPB2</i>       | intronic   | 0.66        | 1.07E-04   | 0.65   | 7.91E-03   | 0.65    | 2.80E-05   | 0.62     | 2.32E-01   | 5.66E-09 |
| rs9891174   | 17  | 38031802 | T     | A     | <i>ZBPB2</i>       | intronic   | 0.67        | 4.21E-05   | 0.65   | 8.45E-03   | 0.65    | 2.92E-05   | 0.63     | 3.45E-01   | 7.87E-09 |
| rs59716545  | 17  | 38031857 | T     | G     | <i>ZBPB2</i>       | intronic   | 0.70        | 7.74E-06   | 0.70   | 1.74E-03   | 0.70    | 2.65E-06   | 0.67     | 9.15E-02   | 9.11E-12 |
| rs36095411  | 17  | 38031865 | T     | G     | <i>ZBPB2</i>       | intronic   | 0.70        | 6.35E-06   | 0.69   | 4.81E-03   | 0.69    | 1.00E-06   | 0.66     | 6.89E-02   | 3.87E-12 |
| rs12939457  | 17  | 38032188 | T     | C     | <i>ZBPB2</i>       | intronic   | 0.66        | 4.87E-05   | 0.66   | 8.32E-03   | 0.66    | 1.05E-04   | 0.62     | 2.37E-01   | 1.19E-08 |
| rs34189114  | 17  | 38032460 | C     | T     | <i>ZBPB2</i>       | intronic   | 0.69        | 4.58E-06   | 0.68   | 2.88E-03   | 0.68    | 1.69E-06   | 0.65     | 9.16E-02   | 5.65E-12 |
| rs35736272  | 17  | 38032680 | T     | C     | <i>ZBPB2</i>       | intronic   | 0.69        | 3.75E-06   | 0.68   | 3.83E-03   | 0.68    | 1.54E-06   | 0.66     | 8.69E-02   | 5.04E-12 |
| rs1054609   | 17  | 38033277 | A     | C     | <i>ZBPB2</i>       | 3'UTR      | 0.66        | 4.07E-05   | 0.65   | 8.10E-03   | 0.65    | 3.11E-05   | 0.62     | 2.32E-01   | 3.39E-09 |
| rs9907088   | 17  | 38035116 | G     | A     | <i>ZBPB2</i>       | downstream | 0.66        | 6.87E-05   | 0.66   | 5.27E-03   | 0.65    | 1.86E-05   | 0.63     | 2.23E-01   | 2.16E-09 |
| rs36038753  | 17  | 38035370 | G     | T     | <i>ZBPB2,GSDMB</i> | intergenic | 0.66        | 6.87E-05   | 0.65   | 3.44E-03   | 0.65    | 2.50E-05   | 0.63     | 2.23E-01   | 2.14E-09 |
| rs35569035  | 17  | 38035624 | C     | T     | <i>ZBPB2,GSDMB</i> | intergenic | 0.69        | 4.58E-06   | 0.68   | 2.88E-03   | 0.68    | 1.25E-06   | 0.65     | 9.16E-02   | 4.33E-12 |
| rs9910826   | 17  | 38035648 | A     | G     | <i>ZBPB2,GSDMB</i> | intergenic | 0.67        | 4.38E-05   | 0.67   | 5.41E-03   | 0.66    | 1.52E-05   | 0.63     | 2.01E-01   | 1.17E-09 |
| rs34074973  | 17  | 38035766 | GAGA  | G     | <i>ZBPB2,GSDMB</i> | intergenic | 0.69        | 4.58E-06   | 0.68   | 2.88E-03   | 0.68    | 1.69E-06   | 0.65     | 9.16E-02   | 5.64E-12 |
| rs9904624   | 17  | 38036586 | A     | G     | <i>ZBPB2,GSDMB</i> | intergenic | 0.66        | 6.87E-05   | 0.66   | 6.02E-03   | 0.65    | 7.94E-06   | 0.63     | 2.23E-01   | 1.15E-09 |
| rs4795398   | 17  | 38038179 | C     | T     | <i>ZBPB2,GSDMB</i> | intergenic | 0.69        | 4.58E-06   | 0.69   | 3.02E-03   | 0.68    | 1.44E-06   | 0.65     | 9.16E-02   | 5.20E-12 |
| rs62067029  | 17  | 38038391 | A     | T     | <i>ZBPB2,GSDMB</i> | intergenic | 0.73        | 2.84E-04   | 0.73   | 6.24E-03   | 0.73    | 8.26E-05   | 0.69     | 7.33E-02   | 3.54E-09 |
| rs148094956 | 17  | 38039561 | TAACA | T     | <i>ZBPB2,GSDMB</i> | intergenic | 0.61        | 7.07E-06   | 0.61   | 1.09E-02   | 0.61    | 2.59E-04   | 0.59     | 2.97E-01   | 1.51E-08 |
| rs12232497  | 17  | 38040119 | T     | C     | <i>ZBPB2,GSDMB</i> | intergenic | 0.69        | 3.75E-06   | 0.68   | 4.00E-03   | 0.68    | 1.26E-06   | 0.66     | 8.69E-02   | 4.37E-12 |
| rs12232498  | 17  | 38040363 | T     | C     | <i>ZBPB2,GSDMB</i> | intergenic | 0.66        | 6.87E-05   | 0.66   | 5.26E-03   | 0.65    | 1.88E-05   | 0.63     | 2.23E-01   | 2.17E-09 |
| rs12941333  | 17  | 38040534 | C     | T     | <i>ZBPB2,GSDMB</i> | intergenic | 0.66        | 6.87E-05   | 0.66   | 5.26E-03   | 0.65    | 1.88E-05   | 0.63     | 2.23E-01   | 2.17E-09 |
| rs2872507   | 17  | 38040763 | G     | A     | <i>ZBPB2,GSDMB</i> | intergenic | 0.66        | 6.87E-05   | 0.66   | 5.26E-03   | 0.65    | 1.56E-05   | 0.63     | 2.23E-01   | 1.85E-09 |
| rs9908132   | 17  | 38042777 | T     | A     | <i>ZBPB2,GSDMB</i> | intergenic | 0.62        | 8.62E-06   | 0.61   | 8.89E-03   | 0.61    | 1.68E-04   | 0.59     | 3.24E-01   | 1.19E-08 |
| rs9901146   | 17  | 38043343 | G     | A     | <i>ZBPB2,GSDMB</i> | intergenic | 0.62        | 8.62E-06   | 0.61   | 8.89E-03   | 0.61    | 1.68E-04   | 0.59     | 3.23E-01   | 1.19E-08 |
| rs12936409  | 17  | 38043649 | C     | T     | <i>ZBPB2,GSDMB</i> | intergenic | 0.69        | 5.69E-06   | 0.68   | 3.56E-03   | 0.68    | 1.54E-06   | 0.65     | 9.02E-02   | 6.74E-12 |

|             |    |          |        |    |              |            |      |          |      |          |      |          |      |          |          |
|-------------|----|----------|--------|----|--------------|------------|------|----------|------|----------|------|----------|------|----------|----------|
| rs12103884  | 17 | 38045725 | C      | T  | ZPBP2,GSDMB  | intergenic | 0.62 | 8.62E-06 | 0.61 | 8.92E-03 | 0.61 | 1.84E-04 | 0.59 | 3.19E-01 | 1.26E-08 |
| rs9906951   | 17 | 38048244 | T      | C  | ZPBP2,GSDMB  | intergenic | 0.61 | 4.26E-06 | 0.61 | 1.42E-02 | 0.61 | 2.79E-04 | 0.58 | 2.73E-01 | 1.21E-08 |
| rs12950209  | 17 | 38049102 | T      | C  | ZPBP2,GSDMB  | intergenic | 0.62 | 1.02E-05 | 0.62 | 6.04E-03 | 0.62 | 1.41E-04 | 0.59 | 3.03E-01 | 7.68E-09 |
| rs12950743  | 17 | 38049233 | T      | C  | ZPBP2,GSDMB  | intergenic | 0.61 | 6.83E-06 | 0.61 | 9.03E-03 | 0.61 | 1.99E-04 | 0.59 | 3.13E-01 | 1.15E-08 |
| rs7359623   | 17 | 38049589 | C      | T  | ZPBP2,GSDMB  | intergenic | 0.62 | 1.07E-05 | 0.62 | 6.14E-03 | 0.62 | 8.42E-05 | 0.59 | 2.89E-01 | 4.50E-09 |
| rs11651596  | 17 | 38056116 | T      | C  | ZPBP2,GSDMB  | intergenic | 0.66 | 5.65E-07 | 0.66 | 4.63E-03 | 0.66 | 1.35E-05 | 0.64 | 6.53E-02 | 6.96E-12 |
| rs12949100  | 17 | 38057189 | G      | A  | ZPBP2,GSDMB  | intergenic | 0.69 | 7.25E-06 | 0.68 | 3.66E-03 | 0.68 | 2.30E-06 | 0.66 | 7.75E-02 | 8.70E-12 |
| rs8069176   | 17 | 38057197 | G      | A  | ZPBP2,GSDMB  | intergenic | 0.63 | 7.37E-06 | 0.63 | 7.04E-03 | 0.64 | 8.83E-05 | 0.61 | 1.52E-01 | 1.15E-09 |
| rs4795399   | 17 | 38061439 | T      | C  | GSDMB        | intronic   | 0.69 | 5.17E-06 | 0.69 | 2.61E-03 | 0.68 | 1.10E-05 | 0.65 | 7.57E-02 | 2.26E-11 |
| rs2305480   | 17 | 38062196 | G      | A  | GSDMB        | exonic     | 0.70 | 2.00E-06 | 0.69 | 2.97E-03 | 0.68 | 6.71E-06 | 0.66 | 7.07E-02 | 7.38E-12 |
| rs2305479   | 17 | 38062217 | C      | T  | GSDMB        | exonic     | 0.68 | 2.24E-06 | 0.66 | 4.17E-03 | 0.66 | 2.21E-05 | 0.64 | 1.55E-01 | 1.28E-10 |
| rs67786416  | 17 | 38062942 | A      | AC | GSDMB        | intronic   | 0.70 | 8.70E-06 | 0.68 | 4.54E-03 | 0.69 | 6.01E-06 | 0.66 | 9.18E-02 | 3.53E-11 |
| rs56750287  | 17 | 38062944 | A      | C  | GSDMB        | intronic   | 0.69 | 1.36E-06 | 0.68 | 4.95E-03 | 0.68 | 1.32E-05 | 0.65 | 7.42E-02 | 1.66E-11 |
| rs11078926  | 17 | 38062976 | G      | A  | GSDMB        | intronic   | 0.70 | 2.00E-06 | 0.69 | 3.32E-03 | 0.69 | 7.11E-06 | 0.66 | 6.99E-02 | 8.18E-12 |
| rs883770    | 17 | 38063381 | C      | T  | GSDMB        | intronic   | 0.68 | 2.24E-06 | 0.66 | 4.16E-03 | 0.66 | 2.36E-05 | 0.64 | 1.54E-01 | 1.35E-10 |
| rs62067034  | 17 | 38063738 | C      | T  | GSDMB        | intronic   | 0.68 | 2.24E-06 | 0.66 | 3.83E-03 | 0.66 | 2.88E-05 | 0.64 | 1.54E-01 | 1.54E-10 |
| rs36000226  | 17 | 38063929 | T      | C  | GSDMB        | intronic   | 0.68 | 2.24E-06 | 0.66 | 4.15E-03 | 0.66 | 2.37E-05 | 0.64 | 1.54E-01 | 1.35E-10 |
| rs36084703  | 17 | 38063980 | CA     | C  | GSDMB        | intronic   | 0.68 | 3.50E-06 | 0.67 | 9.69E-03 | 0.67 | 7.49E-05 | 0.64 | 1.95E-01 | 1.41E-09 |
| rs11078927  | 17 | 38064405 | C      | T  | GSDMB        | intronic   | 0.70 | 1.34E-06 | 0.69 | 2.97E-03 | 0.69 | 7.91E-06 | 0.66 | 7.86E-02 | 8.13E-12 |
| rs11078928  | 17 | 38064469 | T      | C  | GSDMB        | splicing   | 0.70 | 1.34E-06 | 0.69 | 2.97E-03 | 0.69 | 6.75E-06 | 0.66 | 7.86E-02 | 7.02E-12 |
| rs12939832  | 17 | 38064876 | G      | A  | GSDMB        | intronic   | 0.70 | 1.09E-06 | 0.69 | 2.96E-03 | 0.69 | 7.09E-06 | 0.66 | 7.83E-02 | 6.39E-12 |
| rs1008723   | 17 | 38066267 | G      | T  | GSDMB        | intronic   | 0.65 | 4.09E-05 | 0.64 | 6.06E-03 | 0.63 | 1.94E-04 | 0.61 | 2.94E-01 | 2.30E-08 |
| rs4795400   | 17 | 38067020 | C      | T  | GSDMB        | intronic   | 0.69 | 1.08E-06 | 0.69 | 2.22E-03 | 0.68 | 1.62E-05 | 0.66 | 6.34E-02 | 7.74E-12 |
| rs4795401   | 17 | 38067533 | A      | G  | GSDMB        | intronic   | 0.65 | 5.59E-05 | 0.65 | 7.58E-03 | 0.65 | 7.90E-05 | 0.61 | 2.32E-01 | 9.09E-09 |
| rs869402    | 17 | 38068043 | T      | C  | GSDMB        | intronic   | 0.33 | 2.56E-06 | 0.35 | 5.01E-03 | 0.35 | 7.22E-06 | 0.38 | 2.03E-01 | 9.80E-11 |
| rs1011082   | 17 | 38068514 | T      | C  | GSDMB        | intronic   | 0.37 | 1.14E-05 | 0.38 | 3.88E-03 | 0.38 | 5.09E-05 | 0.40 | 2.04E-01 | 1.13E-09 |
| rs921650    | 17 | 38069076 | G      | A  | GSDMB        | intronic   | 0.34 | 6.80E-06 | 0.36 | 9.59E-03 | 0.36 | 8.83E-06 | 0.38 | 1.86E-01 | 2.67E-10 |
| rs921649    | 17 | 38069274 | C      | T  | GSDMB        | intronic   | 0.34 | 6.04E-06 | 0.36 | 9.30E-03 | 0.36 | 8.48E-06 | 0.38 | 1.87E-01 | 2.37E-10 |
| rs5820308   | 17 | 38069364 | TCAAAA | T  | GSDMB        | intronic   | 0.32 | 1.84E-06 | 0.35 | 3.65E-03 | 0.34 | 2.16E-05 | 0.36 | 1.15E-01 | 5.64E-11 |
| rs6503524   | 17 | 38069809 | C      | T  | GSDMB        | intronic   | 0.34 | 6.58E-06 | 0.36 | 9.90E-03 | 0.36 | 7.79E-06 | 0.38 | 1.90E-01 | 2.51E-10 |
| rs7216389   | 17 | 38069949 | C      | T  | GSDMB        | intronic   | 0.34 | 6.58E-06 | 0.36 | 1.31E-02 | 0.36 | 1.11E-05 | 0.38 | 1.91E-01 | 4.16E-10 |
| rs7221605   | 17 | 38070789 | C      | T  | GSDMB        | intronic   | 0.33 | 1.33E-05 | 0.37 | 6.35E-03 | 0.37 | 1.53E-05 | 0.37 | 2.77E-01 | 1.09E-09 |
| rs1031458   | 17 | 38072173 | G      | T  | GSDMB        | intronic   | 0.33 | 1.33E-05 | 0.35 | 1.79E-02 | 0.35 | 1.82E-05 | 0.37 | 2.77E-01 | 2.66E-09 |
| rs1031460   | 17 | 38072247 | T      | G  | GSDMB        | intronic   | 0.33 | 1.33E-05 | 0.35 | 1.86E-02 | 0.35 | 3.22E-05 | 0.37 | 2.85E-01 | 4.68E-09 |
| rs8065777   | 17 | 38072402 | C      | T  | GSDMB        | intronic   | 0.33 | 1.33E-05 | 0.35 | 2.80E-02 | 0.35 | 1.87E-05 | 0.37 | 2.77E-01 | 3.72E-09 |
| rs2872516   | 17 | 38072727 | C      | T  | GSDMB        | intronic   | 0.32 | 4.24E-05 | 0.36 | 1.38E-01 | 0.37 | 3.19E-05 | 0.35 | 1.21E-01 | 8.66E-09 |
| rs146378727 | 17 | 38073837 | CCCG   | C  | GSDMB        | intronic   | 0.36 | 1.39E-04 | 0.39 | 1.99E-02 | 0.39 | 3.46E-05 | 0.41 | 2.59E-01 | 1.72E-08 |
| rs9303279   | 17 | 38073968 | G      | C  | GSDMB        | intronic   | 0.31 | 4.52E-06 | 0.33 | 3.44E-03 | 0.33 | 1.15E-06 | 0.35 | 1.22E-01 | 7.83E-12 |
| rs8076131   | 17 | 38080912 | G      | A  | ORMDL3       | intronic   | 0.32 | 1.52E-05 | 0.33 | 2.52E-02 | 0.34 | 3.92E-07 | 0.36 | 9.22E-02 | 1.74E-11 |
| rs7221814   | 17 | 38089717 | A      | G  | ORMDL3,LRR3C | intergenic | 0.33 | 1.11E-04 | 0.34 | 1.15E-01 | 0.33 | 5.26E-07 | 0.36 | 4.08E-01 | 6.59E-09 |

RAF: reference allele frequency

**Table S2.** Chromosome 17q21 LD comparisons across different cohorts using varLD

| Cohorts Comparisons           | <i>P</i> -values |
|-------------------------------|------------------|
| Hartford-PR PR vs. GALA I PR  | 0.0835           |
| Hartford-PR PR vs. GALA II PR | 0.4591           |
| Hartford-PR PR vs. GALA I MX  | 0.0002           |
| Hartford-PR PR vs. GALA I MX  | 0.0007           |
| Hartford-PR PR vs. 1000G EUR  | 0.0001           |

**Table S3.** SNPs in *IL33* with meta-analysis (Hartford-PR, GALA I, GALA II and HCHS/SOL) *P*-values < 0.01

| SNP        | Chr | Position | Ref | Alt | Gene        | Hartford-PR |      |                 | GALA I |      |                 | GALA II |      |                 | HCHS/SOL |      |                 | Combined |                 |
|------------|-----|----------|-----|-----|-------------|-------------|------|-----------------|--------|------|-----------------|---------|------|-----------------|----------|------|-----------------|----------|-----------------|
|            |     |          |     |     |             | AAF         | OR   | <i>P</i> -value | AAF    | OR   | <i>P</i> -value | AAF     | OR   | <i>P</i> -value | AAF      | OR   | <i>P</i> -value | OR       | <i>P</i> -value |
| rs10815393 | 9   | 6240324  | T   | C   | <i>IL33</i> | 0.20        | 1.09 | 0.480           | 0.23   | 1.47 | 0.085           | 0.20    | 1.17 | 0.076           | 0.20     | 1.21 | 0.056           | 1.18     | 0.002           |
| rs10975504 | 9   | 6235009  | A   | G   | <i>IL33</i> | 0.20        | 1.07 | 0.588           | 0.24   | 1.47 | 0.087           | 0.20    | 1.17 | 0.073           | 0.20     | 1.20 | 0.059           | 1.17     | 0.003           |
| rs10975507 | 9   | 6236977  | A   | T   | <i>IL33</i> | 0.20        | 1.06 | 0.619           | 0.24   | 1.47 | 0.086           | 0.20    | 1.18 | 0.053           | 0.20     | 1.18 | 0.081           | 1.17     | 0.003           |
| rs7035413  | 9   | 6243119  | A   | G   | <i>IL33</i> | 0.19        | 1.06 | 0.607           | 0.23   | 1.47 | 0.086           | 0.19    | 1.16 | 0.089           | 0.19     | 1.20 | 0.063           | 1.16     | 0.004           |
| rs12339348 | 9   | 6233082  | A   | T   | <i>IL33</i> | 0.19        | 1.06 | 0.636           | 0.23   | 1.48 | 0.083           | 0.19    | 1.17 | 0.086           | 0.19     | 1.19 | 0.075           | 1.17     | 0.005           |
| rs72689565 | 9   | 6240953  | A   | C   | <i>IL33</i> | 0.19        | 1.08 | 0.532           | 0.23   | 1.48 | 0.082           | 0.20    | 1.15 | 0.110           | 0.19     | 1.19 | 0.076           | 1.17     | 0.005           |

**Table S4.** Results of the meta-analysis of GWAS of childhood asthma, for SNPs previously associated with asthma in meta-analysis of GWAS of asthma in Europeans (GABRIEL) and ethnically diverse North American populations (EVE)

| SNP                                                                                                     | Chr | Position  | Ref | Alt | Gene    | In cited paper | Hartford-PR |      |                      |      | GALA I |         |      | GALA II |                      |      | Combined              |  |
|---------------------------------------------------------------------------------------------------------|-----|-----------|-----|-----|---------|----------------|-------------|------|----------------------|------|--------|---------|------|---------|----------------------|------|-----------------------|--|
|                                                                                                         |     |           |     |     |         | OR             | AAF         | OR   | P-value              | AAF  | OR     | P-value | AAF  | OR      | P-value              | OR   | P-value               |  |
| Loci reported by the GABRIEL consortium in Moffatt M.F. et al. N Engl J Med 2010; 363:1211-21           |     |           |     |     |         |                |             |      |                      |      |        |         |      |         |                      |      |                       |  |
| rs3771166                                                                                               | 2   | 102986222 | G   | A   | IL18R1  | 0.85*          | 0.45        | 0.90 | 0.500                | 0.44 | 0.75   | 0.114   | 0.43 | 0.85    | 0.018                | 0.85 | 0.003                 |  |
| rs9273349                                                                                               | 6   | 32625869  | A   | G   | HLA-DQ  | 1.14           | 0.61        | 0.98 | 0.860                | NA   | NA     | NA      | NA   | NA      | NA                   | 0.98 | 0.860                 |  |
| rs1342326                                                                                               | 9   | 6190076   | A   | C   | IL33    | 1.27           | 0.21        | 0.90 | 0.403                | 0.26 | 1.12   | 0.571   | 0.22 | 1.05    | 0.528                | 1.02 | 0.804                 |  |
| rs744910                                                                                                | 15  | 67446785  | G   | A   | SMAD3   | 0.89           | 0.43        | 0.88 | 0.175                | 0.42 | 1.01   | 0.981   | 0.45 | 0.93    | 0.269                | 0.91 | 0.118                 |  |
| rs2305480                                                                                               | 17  | 38062196  | G   | A   | GSDMB   | 0.76           | 0.31        | 0.62 | 2.0×10 <sup>-6</sup> | 0.31 | 0.54   | 0.003   | 0.32 | 0.71    | 6.7×10 <sup>-6</sup> | 0.66 | 1.5×10 <sup>-12</sup> |  |
| rs3894194                                                                                               | 17  | 38121993  | G   | A   | GSDMA   | 1.26           | 0.37        | 1.23 | 0.034                | 0.39 | 0.92   | 0.648   | 0.40 | 1.23    | 0.002                | 1.20 | 0.001                 |  |
| rs2284033                                                                                               | 22  | 37534034  | G   | A   | IL2RB   | 0.92           | 0.41        | 0.91 | 0.272                | 0.39 | 1.09   | 0.638   | 0.40 | 1.17    | 0.024                | 1.06 | 0.202                 |  |
| rs2073643                                                                                               | 5   | 131723288 | T   | C   | SLC22A5 | 0.89           | 0.50        | 0.96 | 0.668                | 0.48 | 1.18   | 0.356   | 0.50 | 0.93    | 0.257                | 0.96 | 0.401                 |  |
| rs1295686                                                                                               | 5   | 131995843 | T   | C   | IL13    | 0.85           | 0.59        | 1.01 | 0.943                | 0.62 | 0.75   | 0.136   | 0.62 | 0.90    | 0.159                | 0.90 | 0.117                 |  |
| rs11071559                                                                                              | 15  | 61069988  | C   | T   | RORA    | 0.88           | 0.26        | 1.07 | 0.525                | 0.25 | 1.69   | 0.012   | 0.24 | 0.90    | 0.193                | 1.01 | 0.763                 |  |
| Replicated genes reported by the EVE consortium in Torgerson D.G. et al. Nat. Genet. 2011; 43(9):887-92 |     |           |     |     |         |                |             |      |                      |      |        |         |      |         |                      |      |                       |  |
| rs1102000                                                                                               | 1   | 158932907 | T   | C   | PYHIN1  | 0.76*          | 0.08        | 1.09 | 0.651                | 0.06 | 0.50   | 0.061   | NA   | NA      | NA                   | 0.93 | 0.562                 |  |
| rs10173081                                                                                              | 2   | 102957348 | C   | T   | IL1RL1  | 0.83           | 0.19        | 0.84 | 0.132                | 0.16 | 0.85   | 0.519   | 0.26 | 0.78    | 0.010                | 0.81 | 0.003                 |  |
| rs1837253                                                                                               | 5   | 110401872 | C   | T   | TSLP    | 0.84           | 0.25        | 0.73 | 0.004                | 0.23 | 0.65   | 0.041   | 0.27 | 0.83    | 0.014                | 0.78 | 3.1×10 <sup>-5</sup>  |  |
| rs2381416                                                                                               | 9   | 6193455   | A   | C   | IL33    | 1.18           | 0.38        | 0.98 | 0.847                | 0.39 | 1.00   | 0.980   | 0.37 | 1.09    | 0.249                | 1.05 | 0.441                 |  |
| rs11078927                                                                                              | 17  | 38064405  | C   | T   | GSDMB   | 0.79           | 0.30        | 0.61 | 1.4×10 <sup>-6</sup> | 0.31 | 0.55   | 0.003   | 0.31 | 0.71    | 7.9×10 <sup>-6</sup> | 0.66 | 1.4×10 <sup>-12</sup> |  |

Chr: chromosome; Ref: reference allele; Alt: alternative allele; AAF: alternative allele frequency; OR: odds ratio.

\*: This column is childhood onset odds ratio in Moffatt M.F. et al. N Engl J Med 2010; 363:1211-21.

#: This column is overall odds ratio in Torgerson D.G. et al. Nat. Genet. 2011; 43(9):887-92.

Human Genome version: hg19

**Figure S1. QQ plot for the meta-analysis (Hartford-PR, GALA I, GALA II and HCHS/SOL)**

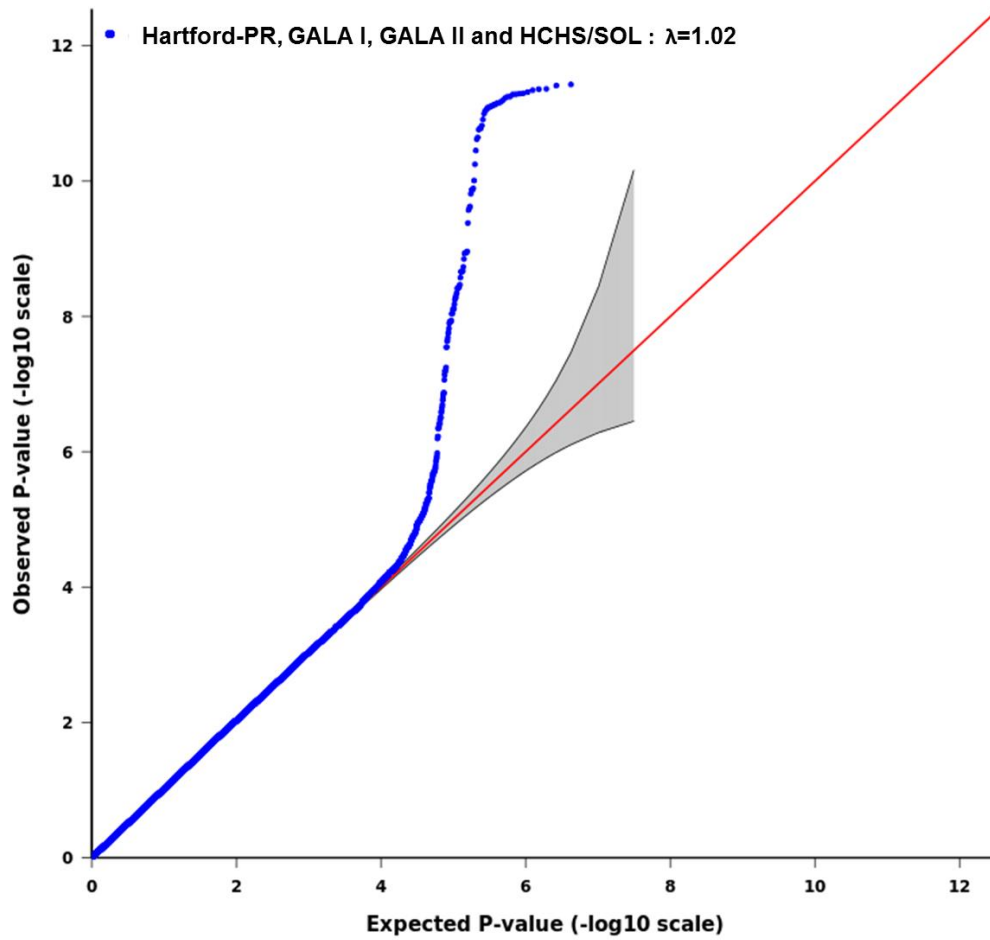

$\lambda$  is the genomic control value.

**Figure S2. Manhattan plots showing the GWAS results of Hartford-PR, GALA I, GALA II and HCHS/SOL**

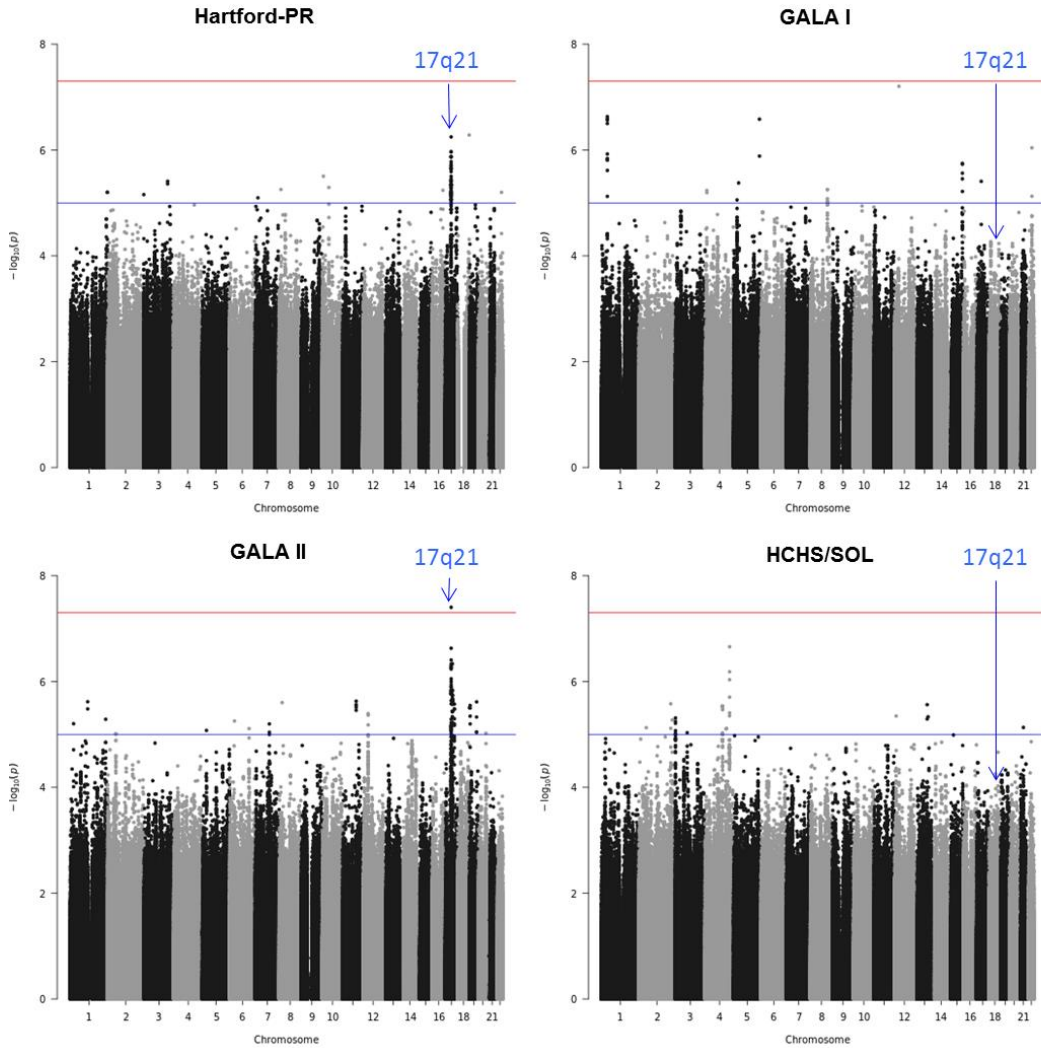

The blue line represents the suggestive significance line ( $P < 1 \times 10^{-5}$ ). The red line represents the conservative significance line ( $P < 5 \times 10^{-8}$ ). The blue arrows mark the 17q21 region on chromosome 17. The detailed information of 17q21 is shown in Figure S6.



**Figure S3. QQ plot for the GWAS results of Hartford-PR, GALA I, GALA II and HCHS/SOL**

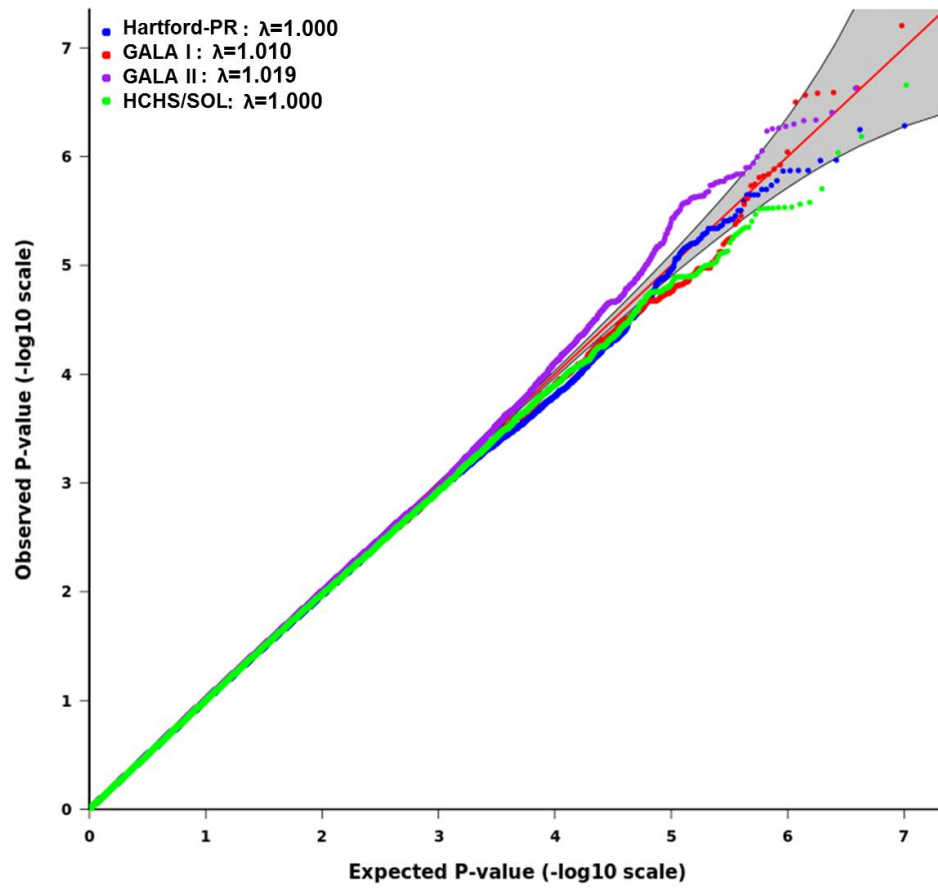

$\lambda$  is the genomic control value.

**Figure S4. Manhattan plot showing the summary meta-analysis results of the Hartford-PR, GALA I, and GALA II**

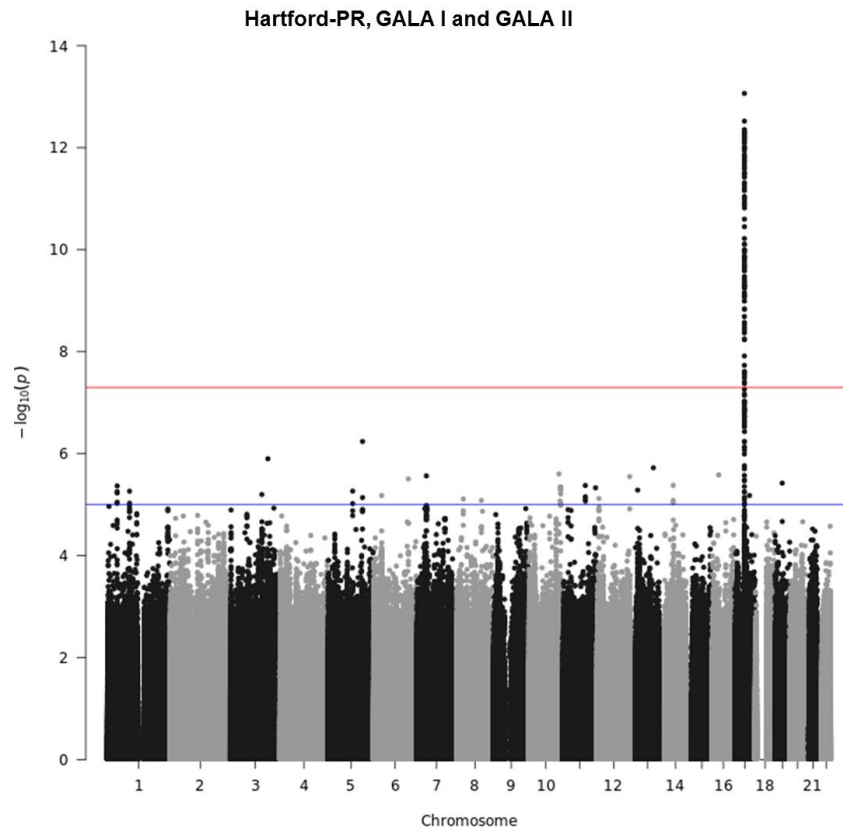

The blue line represents the suggestive significance line ( $P < 1 \times 10^{-5}$ ). The red line represents the significance threshold ( $P < 5 \times 10^{-8}$ ).

**Figure S5. QQ plot for the meta-analysis (Hartford-PR, GALA I and GALA II)**

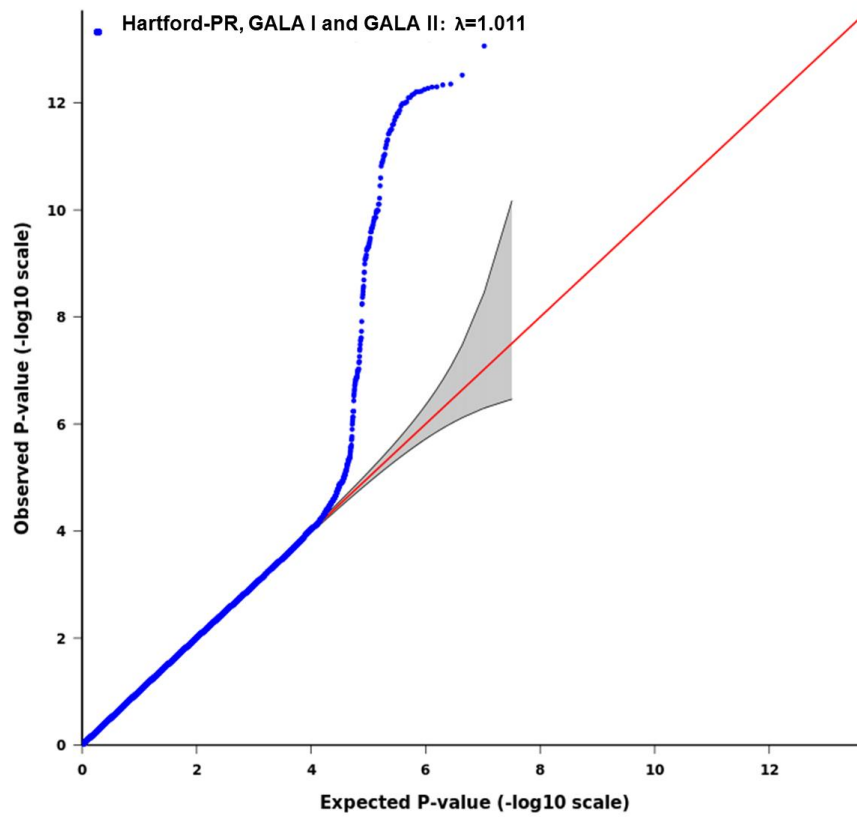

$\lambda$  is the genomic control value.

**Figure S6. GWAS results of Hartford-PR, GALA I, GALA II and HCHS/SOL on the chromosome 17 region**

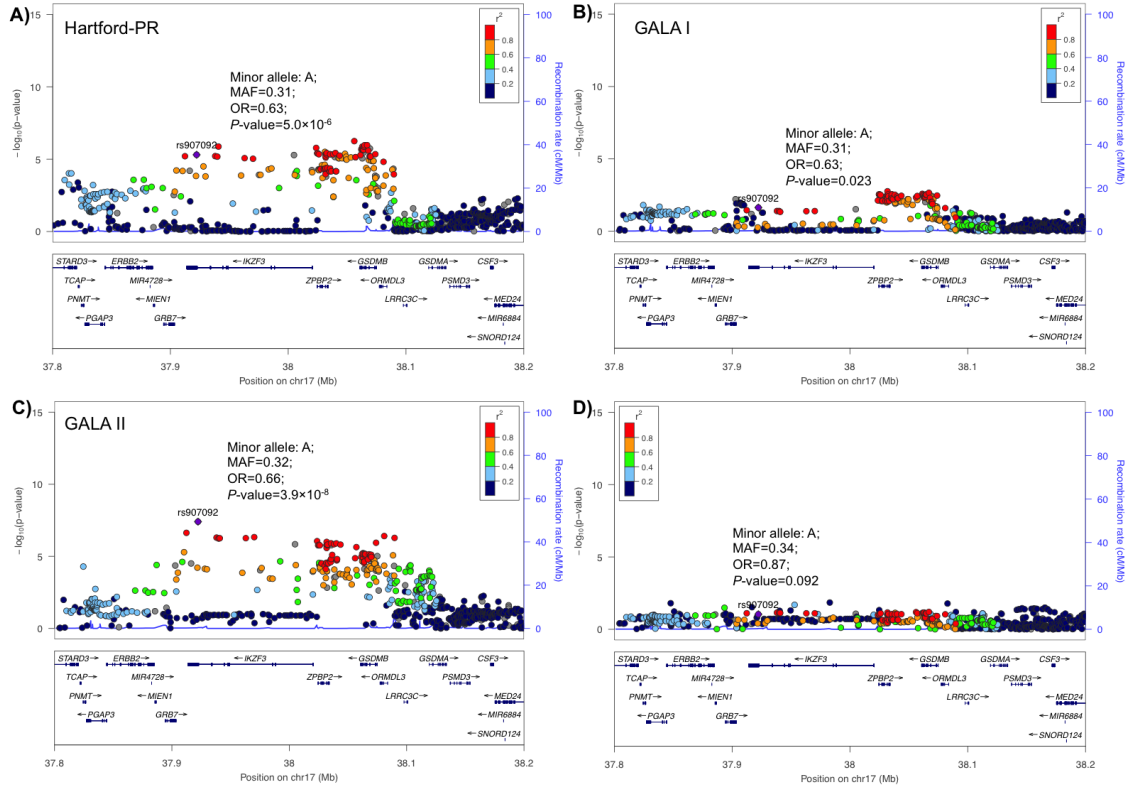

The relative location of genes and the direction of transcription are shown in the lower portion of the figure, and the chromosomal position is shown on the  $x$  axis. The light blue line show the recombination rate across the region (right  $y$  axis), and the left  $y$  axis shows the significance of the associations. The purple diamond shows the  $P$ -value for rs907092 that is the most significant SNP in the meta-analysis (Hartford-PR, GALA I, GALA II and HCHS/SOL). The circles show the  $P$ -values for all other SNPs and are color coded according to the level of LD with rs907092 in the 1000 Genome Project AMR population.

**Figure S7. Results of the meta-analysis (Hartford-PR, GALA I and GALA II) on the chromosome 17 region**

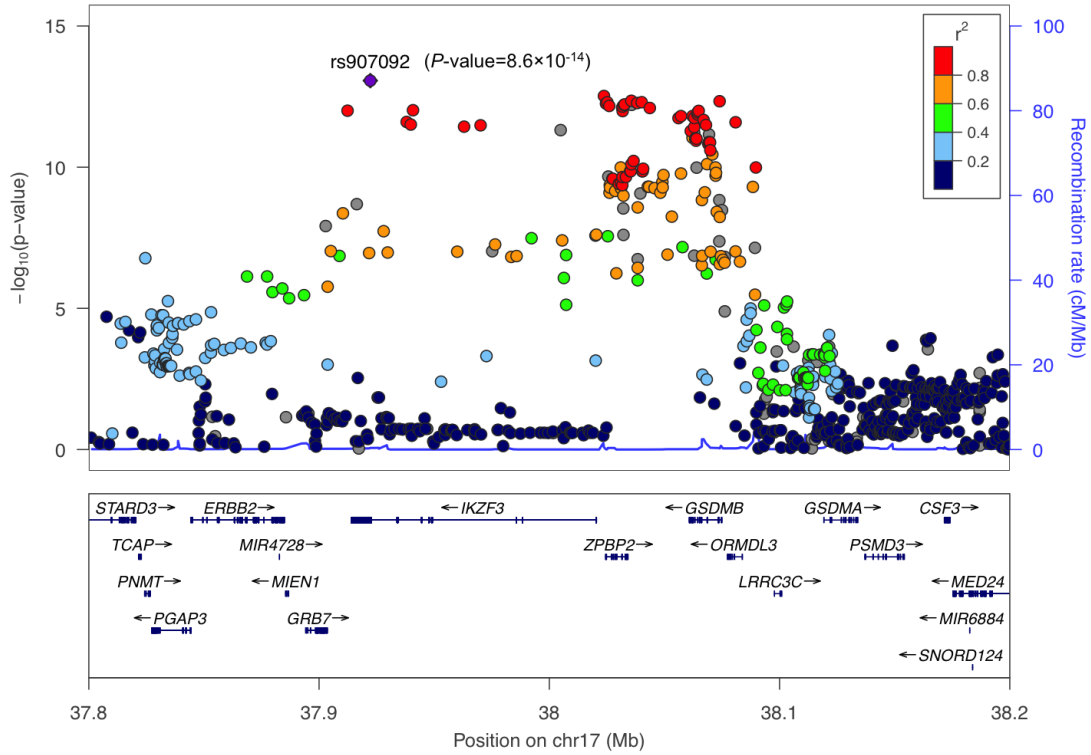

The relative location of genes and the direction of transcription are shown in the lower portion of the figure, and the chromosomal position is shown on the  $x$  axis. The light blue line show the recombination rate across the region (right  $y$  axis), and the left  $y$  axis shows the significance of the associations. The purple diamond shows the  $P$ -value for rs907092 that is the most significant SNP in the meta-analysis (Hartford-PR, GALA I and GALA II). The circles show the  $P$ -values for all other SNPs and are color coded according to the level of LD with rs907092 in the 1000 Genome Project AMR population.

**Figure S8. The 17q21 region of Hartford-PR**

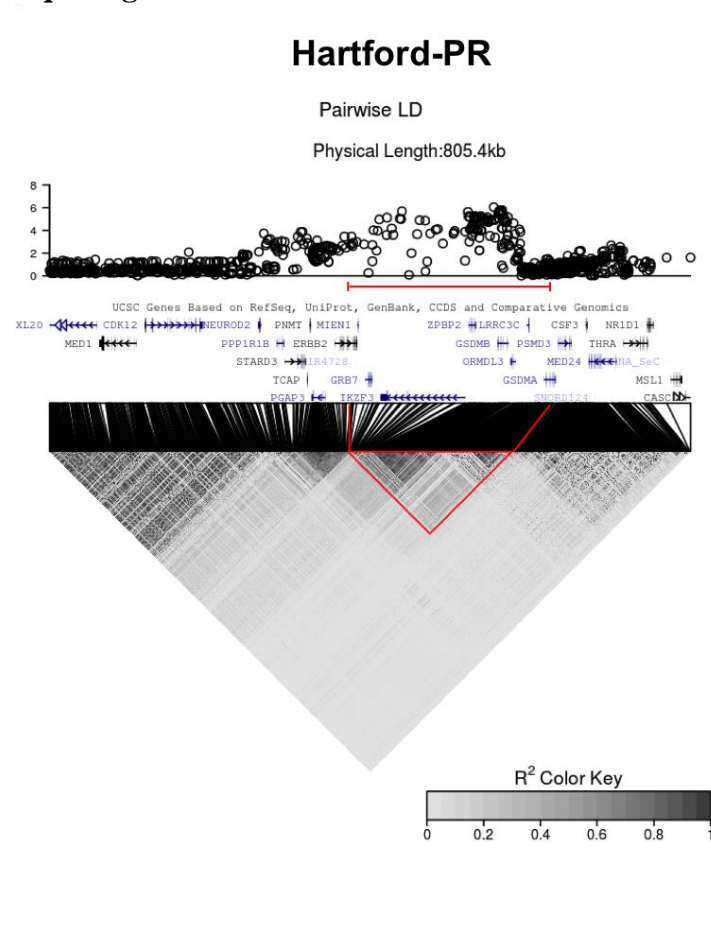

The top portion shows the  $-\log_{10}$  transformed  $P$ -values, the middle portion shows the relative location of genes, and the bottom portion shows the LD structure. The red color marked region shows the second LD block in this region.

**Figure S9. The 17q21 region of GALA I**

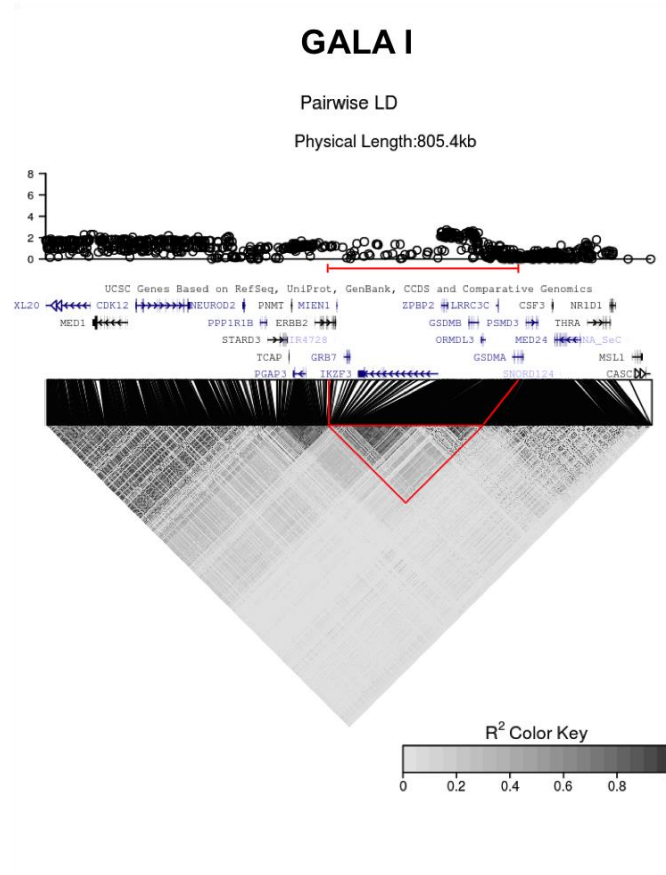

The top portion shows the  $-\log_{10}$  transformed  $P$ -values, the middle portion shows the relative location of genes, and the bottom portion shows the LD structure. The red color marked region shows the second LD block in this region.

**Figure S10. The 17q21 region of GALA II**

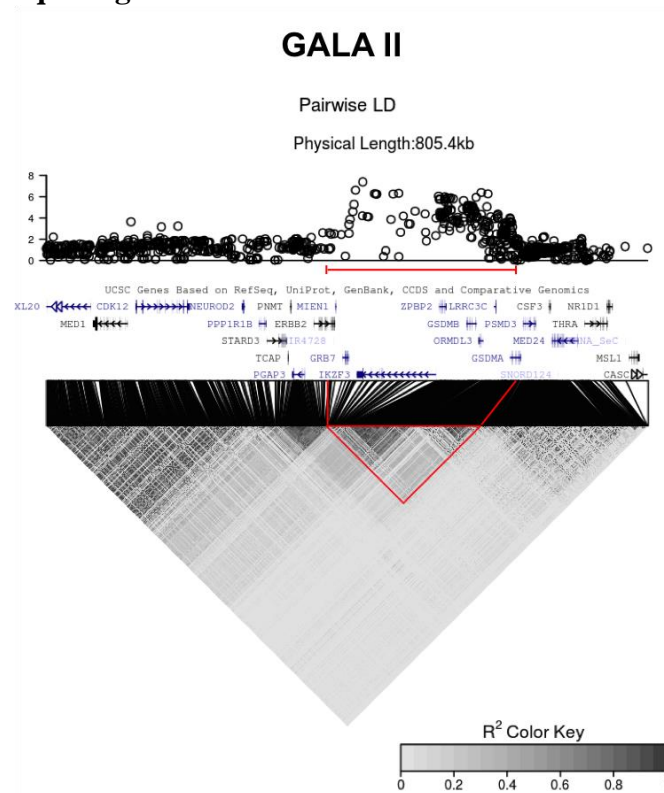

The top portion shows the  $-\log_{10}$  transformed  $P$ -values, the middle portion shows the relative location of genes, and the bottom portion shows the LD structure. The red color marked region shows the second LD block in this region.



**Figure S11. The 17q21 region of Mexican subjects from GALA I and GALA II, and European subjects from 1000 Genome Project.**

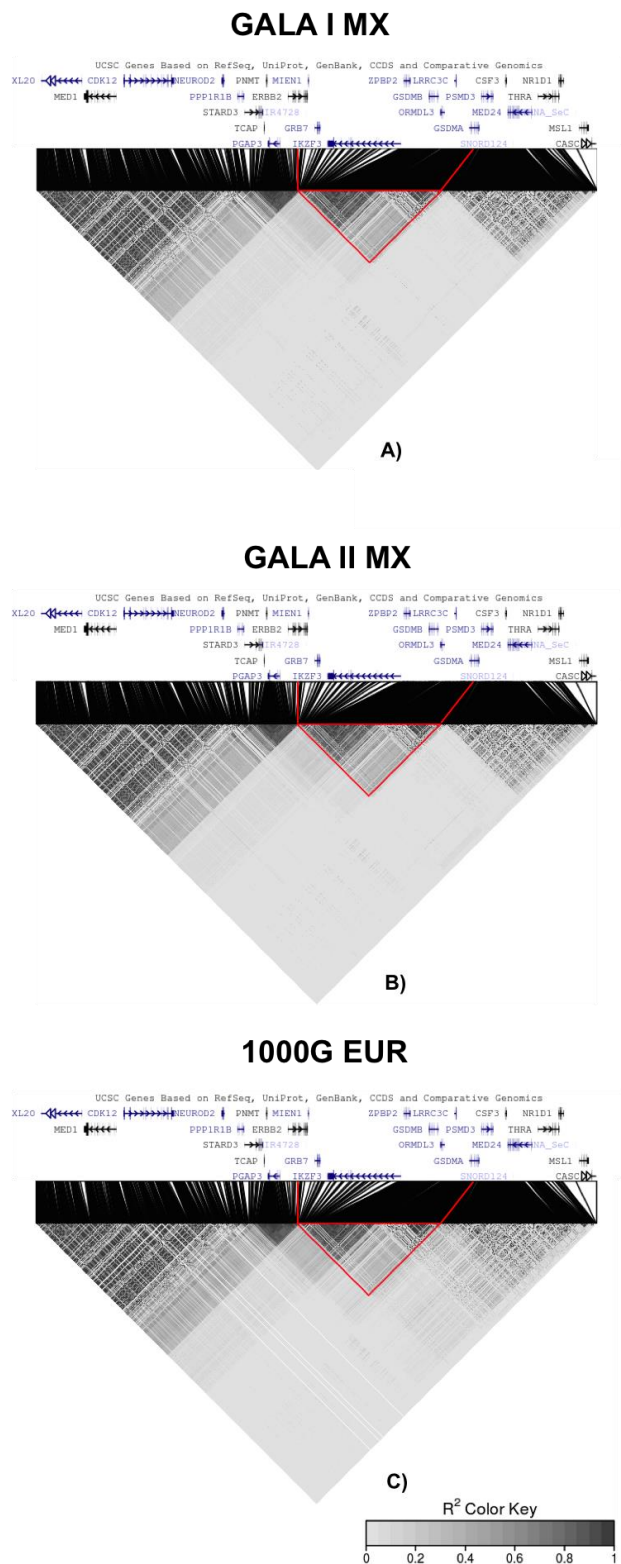

**Figure S12. The *IL33* region of Puerto Ricans from Hartford-PR, Mexicans from 1000 Genome Project, and Europeans from 1000 Genome Project.**

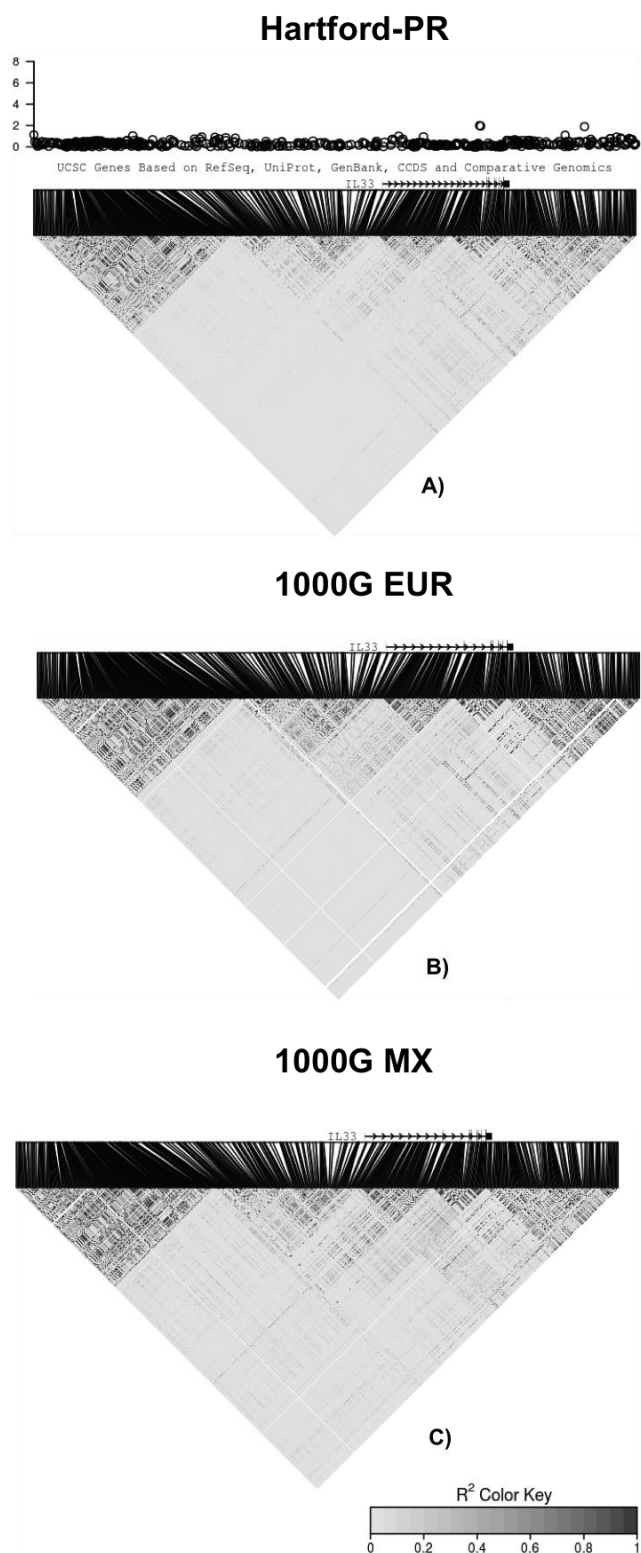

Supplement: inline-supplementary-material-1 [file inline-supplementary-material-1.pdf]
